# Supplementary material for: Nanostructure Engineering of Metal–Organic Derived Frameworks: Cobalt Phosphide Embedded in Carbon Nanotubes as an Efficient ORR Catalyst
Source: MDPI journal article supplement (doi:10.3390/molecules26216672), 2021-11-04
Supplement: s1 [file s1]

## SUPPORTING INFORMATION

### **Nanostructure engineering of metal organic derived frameworks: Cobalt phosphide embedded carbon nanotubes as an efficient ORR catalyst**

Syed Shoaib Ahmad Shah<sup>1,2</sup>, Tayyaba Najam<sup>3\*</sup>, Costas Molochas<sup>6</sup>, Muhammad Altaf Nazir<sup>1</sup>, Angeliki Brouzgou<sup>4</sup>, Muhammad Sufyan Javed<sup>5</sup>, Aziz ur Rehman<sup>1\*</sup>, Panagiotis Tsiakaras<sup>6,7,8\*</sup>

<sup>1</sup> Institute of Chemistry, the Islamia University of Bahawalpur 63100, Pakistan.

<sup>2</sup> Hefei National Laboratory for Physical Sciences at the Microscale, CAS Key Laboratory of Soft Matter Chemistry, Department of Chemistry, University of Science and Technology of China, Hefei, Anhui 230026, China.

<sup>3</sup> Institute for Advanced Study, Shenzhen University, Shenzhen 518060, China.

<sup>4</sup> Department of Energy Systems, Faculty of Technology, University of Thessaly, Geopolis, 41500, Larissa, Greece.

<sup>5</sup> School of Physical Science and Technology, Lanzhou University, Lanzhou 730000, P. R China.

<sup>6</sup> Laboratory of Alternative Energy Conversion Systems, Department of Mechanical Engineering, School of Engineering, University of Thessaly, Pedion Areos, 38834, Greece.

<sup>7</sup> Laboratory of Materials and Devices for Clean Energy, Department of Technology of Electrochemical Processes, Ural Federal University, 19 Mira Str., Yekaterinburg 620002, Russia.

<sup>8</sup> Laboratory of Electrochemical Devices Based on Solid Oxide Proton Electrolytes, Institute of High Temperature Electrochemistry, RAS, Yekaterinburg 620990, Russia.

\*Corresponding authors: tayyabanajam@outlook.com, (T. Najam), azizypk@yahoo.com (A. Rehman), tsiak@uth.gr (P. Tsiakaras).

## 1. Figures and Tables

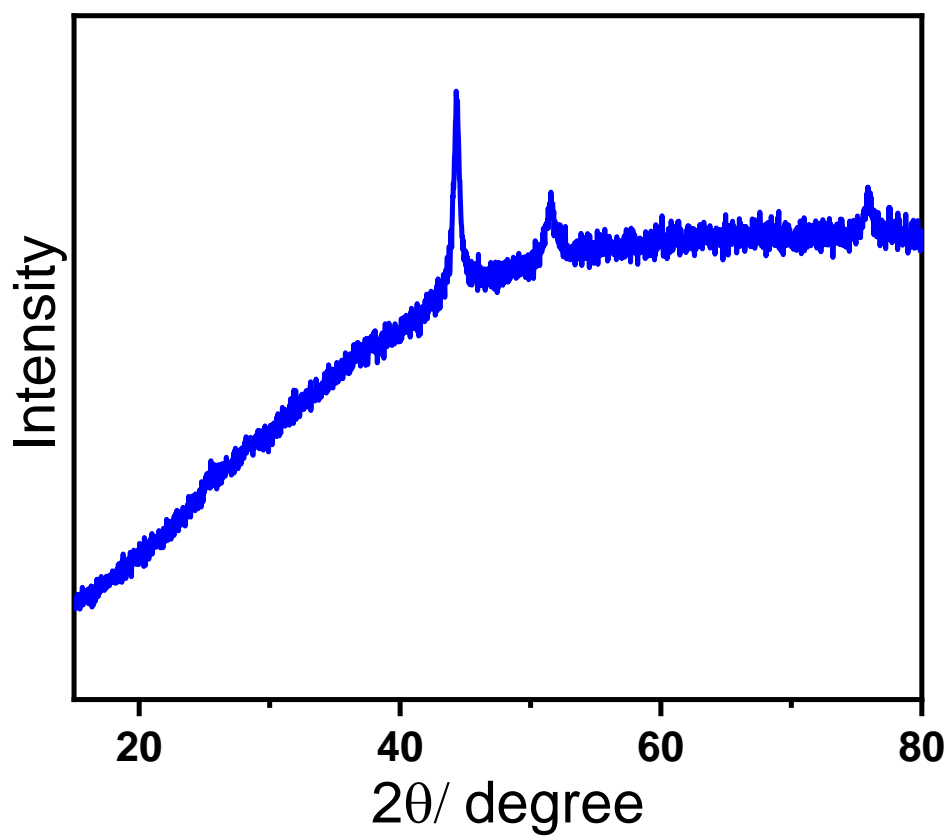

**Figure S1:** XRD pattern of Co-NC.

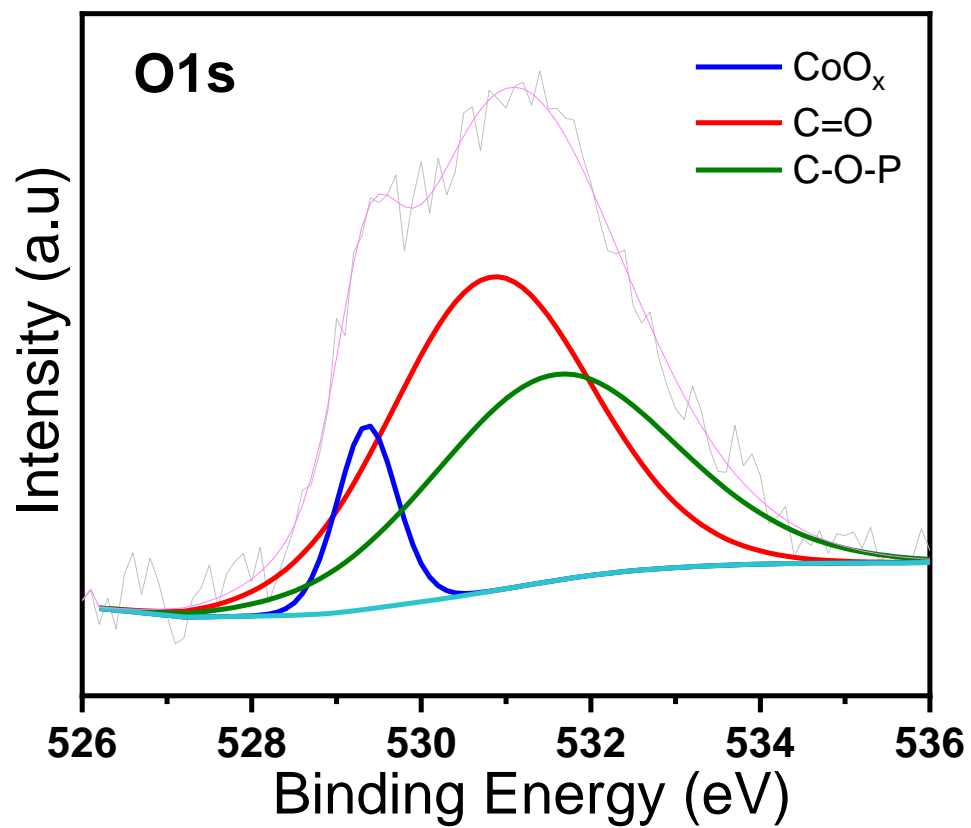

**Figure S2:** High resolution O1s XPS analysis of P-Co-CNTs.

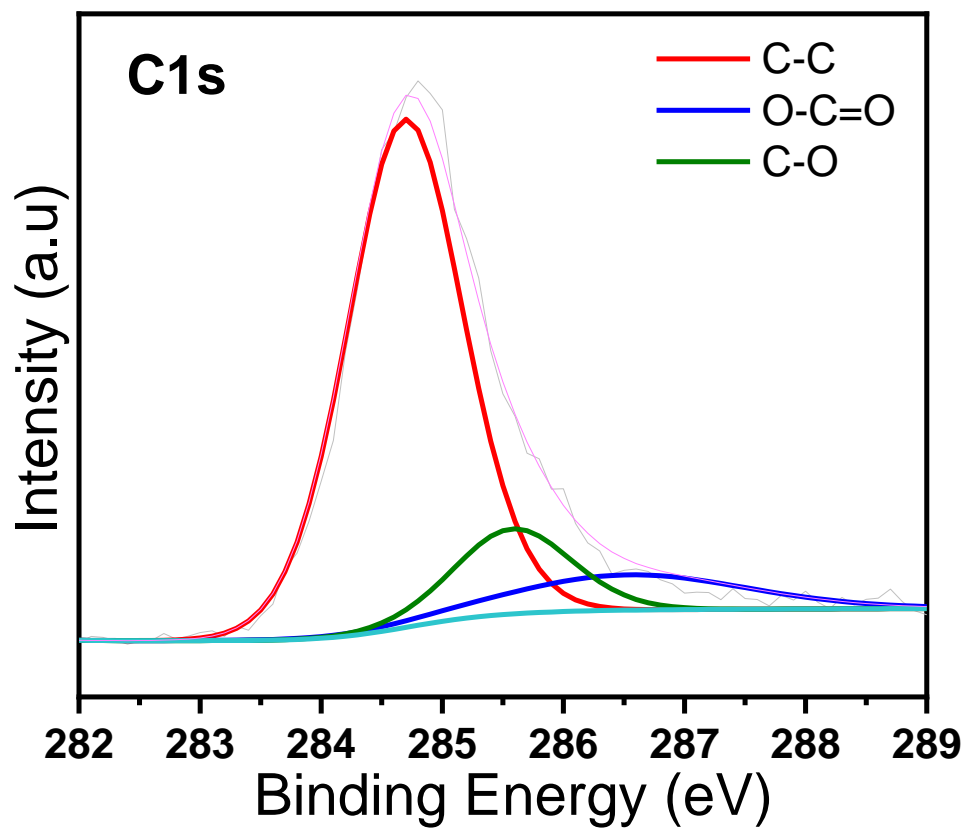

**Figure S3:** High resolution C1s XPS analysis of P-Co-CNTs.

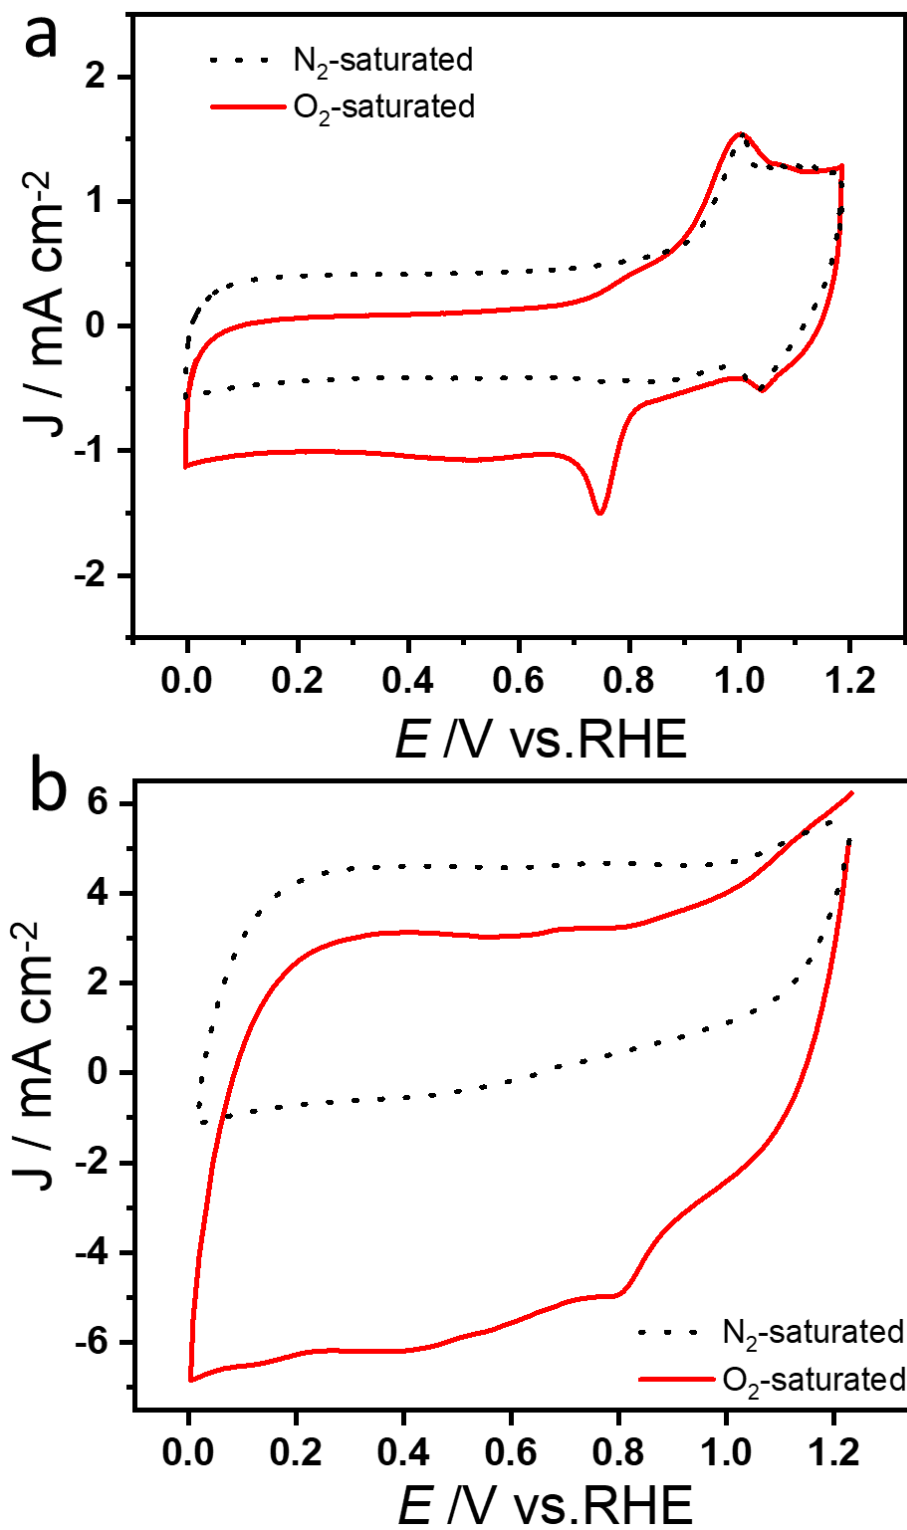

**Figure S4:** CV curves conducted under  $\text{N}_2$  and  $\text{O}_2$  saturated 0.1 M KOH solution;  
a) Co-CNTs, b) P-Co-CNTs.

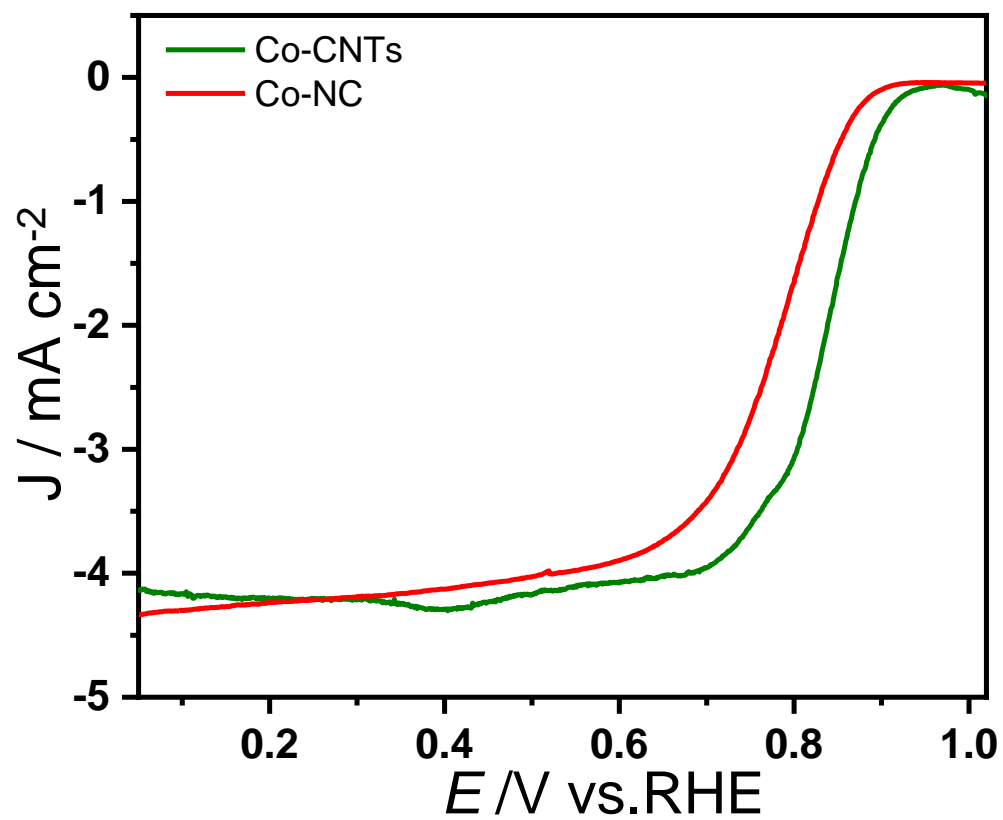

**Figure S5:** ORR-LSV curves conducted under  $\text{O}_2$  saturated 0.1 M KOH solution.

**Table S1.** Elemental contents of P-Co-CNTs determined by XPS spectra.

| <b>C</b><br>( <i>atm%</i> ) | <b>N</b><br>( <i>atm%</i> ) | <b>O</b><br>( <i>atm%</i> ) | <b>P</b><br>( <i>atm%</i> ) | <b>Co</b><br>( <i>atm%</i> ) |
|-----------------------------|-----------------------------|-----------------------------|-----------------------------|------------------------------|
| 91.07                       | 2.16                        | 3.64                        | 1.61                        | 1.52                         |

**Table S2:** Comparative study of ORR performance of the as-synthesized catalyst with reported catalysts under 0.1 M KOH solution vs. RHE.

| <b>Catalyst</b>                       | <b>E<sub>1/2</sub> (V)</b> | <b>References</b> |
|---------------------------------------|----------------------------|-------------------|
| <i>P-Co-CNTs</i>                      | <i>0.887</i>               | <i>This work</i>  |
| Co-N-C                                | 0.87                       | [1]               |
| Fe-N-C                                | 0.88                       | [2]               |
| Co <sub>0.85</sub> Se@NC              | 0.817                      | [3]               |
| Fe-N-C                                | 0.86                       | [4]               |
| NS/rGO-Co <sub>4</sub>                | 0.84                       | [5]               |
| Fe, Co-NC                             | 0.85                       | [6]               |
| Co <sub>3</sub> O <sub>4</sub> /NCMTs | 0.778                      | [7]               |
| Co/N-PC                               | 0.871                      | [8]               |
| Co-N-C /PC                            | 0.88                       | [9]               |
| Co <sub>9</sub> S <sub>8</sub> /NC    | 0.82                       | [10]              |
| CF-NG-Co                              | 0.85                       | [11]              |
| Co/N-PC                               | 0.82                       | [12]              |
| Co/N-C-800                            | 0.74                       | [13]              |
| CNT/N-PC                              | 0.88                       | [14]              |
| CoS <sub>1.097</sub> -PC              | 0.81                       | [15]              |
| CoS <sub>2</sub> (400)/N,S-GO         | 0.79                       | [16]              |
| Co/Co <sub>3</sub> O <sub>4</sub> -C  | 0.8                        | [17]              |

## References:

- [1] B.Y. Guan, L. Yu, X.W. Lou, Formation of Single-Holed Cobalt/N-Doped Carbon Hollow Particles with Enhanced Electrocatalytic Activity toward Oxygen Reduction Reaction in Alkaline Media, *Advanced Science*, 4 (2017) 1700247.
- [2] T. Liu, P. Zhao, X. Hua, W. Luo, S. Chen, G. Cheng, An Fe-N-C hybrid electrocatalyst derived from a bimetal-organic framework for efficient oxygen reduction, *Journal of Materials Chemistry A*, 4 (2016) 11357-11364.
- [3] T. Meng, J. Qin, S. Wang, D. Zhao, B. Mao, M. Cao, In situ coupling of Co<sub>0.85</sub>Se and N-doped carbon via one-step selenization of metal-organic frameworks as a trifunctional catalyst for overall water splitting and Zn-air batteries, *J. Mater. Chem. A*, 5 (2017) 7001-7014.
- [4] S.H. Ahn, X. Yu, A. Manthiram, "Wiring" Fe-N<sub>x</sub>-Embedded Porous Carbon Framework onto 1D Nanotubes for Efficient Oxygen Reduction Reaction in Alkaline and Acidic Media, *Advanced Materials*, 29 (2017) 1606534.
- [5] N. Wang, L. Li, D. Zhao, X. Kang, Z. Tang, S. Chen, Graphene Composites with Cobalt Sulfide: Efficient Trifunctional Electrocatalysts for Oxygen Reversible Catalysis and Hydrogen Production in the Same Electrolyte, *Small*, 13 (2017) 1701025.
- [6] J. Xi, Y. Xia, Y. Xu, J. Xiao, S. Wang, (Fe,Co)@nitrogen-doped graphitic carbon nanocubes derived from polydopamine-encapsulated metal-organic frameworks as a highly stable and selective non-precious oxygen reduction electrocatalyst, *Chem. Commun.*, 51 (2015) 10479-10482.
- [7] B. Wang, L. Xu, G. Liu, P. Zhang, W. Zhu, J. Xia, H. Li, Biomass willow catkin-derived Co<sub>3</sub>O<sub>4</sub>/N-doped hollow hierarchical porous carbon microtubes as an effective tri-functional electrocatalyst, *J. Mater. Chem. A*, 5 (2017) 20170-20179.
- [8] B. You, N. Jiang, M. Sheng, W.S. Drisdell, J. Yano, Y. Sun, Bimetal-Organic Framework Self-Adjusted Synthesis of Support-Free Nonprecious Electrocatalysts for Efficient Oxygen Reduction, *ACS Catalysis*, 5 (2015) 7068-7076.
- [9] P. Yin, T. Yao, Y. Wu, L. Zheng, Y. Lin, W. Liu, H. Ju, J. Zhu, X. Hong, Z. Deng, G. Zhou, S. Wei, Y. Li, Single Cobalt Atoms with Precise N-Coordination as Superior Oxygen Reduction Reaction Catalysts, *Angewandte Chemie International Edition*, 55 (2016) 10800-10805.
- [10] H. Hu, L. Han, M. Yu, Z. Wang, X.W. Lou, Metal-organic-framework-engaged formation of Co nanoparticle-embedded carbon@Co<sub>9</sub>S<sub>8</sub> double-shelled nanocages for efficient oxygen reduction, *Energy & Environmental Science*, 9 (2016) 107-111.
- [11] Z. Pei, Z. Tang, Z. Liu, Y. Huang, Y. Wang, H. Li, Q. Xue, M. Zhu, D. Tang, C. Zhi, Construction of a hierarchical 3D Co/N-carbon electrocatalyst for efficient oxygen reduction and overall water splitting, *J. Mater. Chem. A*, 6 (2018) 489-497.
- [12] J.-N. Zheng, S.-S. Li, X. Ma, F.-Y. Chen, A.-J. Wang, J.-R. Chen, J.-J. Feng, Green synthesis of core-shell gold-palladium@palladium nanocrystals dispersed on graphene with enhanced catalytic activity toward oxygen reduction and methanol oxidation in alkaline media, *Journal of Power Sources*, 262 (2014) 270-278.
- [13] Y. Su, Y. Zhu, H. Jiang, J. Shen, X. Yang, W. Zou, J. Chen, C. Li, Cobalt nanoparticles embedded in N-doped carbon as an efficient bifunctional electrocatalyst for oxygen reduction and evolution reactions, *Nanoscale*, 6 (2014) 15080-15089.
- [14] D. Geng, N. Ding, T.S.A. Hor, Z. Liu, X. Sun, Y. Zong, Potential of metal-free "graphene alloy" as electrocatalysts for oxygen reduction reaction, *Journal of Materials Chemistry A*, 3 (2015) 1795-1810.
- [15] F. Bai, H. Huang, C. Hou, P. Zhang, Porous carbon-coated cobalt sulfide nanocomposites derived from metal organic frameworks (MOFs) as an advanced oxygen reduction electrocatalyst, *New Journal of Chemistry*, 40 (2016) 1679-1684.
- [16] P. Ganesan, M. Prabu, J. Sanetuntikul, S. Shanmugam, Cobalt Sulfide Nanoparticles Grown on Nitrogen and Sulfur Codoped Graphene Oxide: An Efficient Electrocatalyst for Oxygen Reduction and Evolution Reactions, *ACS Catal.*, 5 (2015) 3625-3637.
- [17] A. Aijaz, J. Masa, C. Rösler, W. Xia, P. Weide, A.J.R. Botz, R.A. Fischer, W. Schuhmann, M. Muhler, Co@Co<sub>3</sub>O<sub>4</sub> Encapsulated in Carbon Nanotube-Grafted Nitrogen-Doped Carbon Polyhedra as an Advanced Bifunctional Oxygen Electrode, *Angewandte Chemie International Edition*, 55 (2016) 4087-4091.
